# Supplementary material for: Efficient axonal transport of endolysosomes relies on the balanced ratio of microtubule tyrosination and detyrosination
Source: PubMed Central journal article supplement (PMC11112122; doi:10.1242/jcs.261737), 2024-04-30
Supplement: joces-137-261737-s1.pdf [file joces-137-261737-s1.pdf]

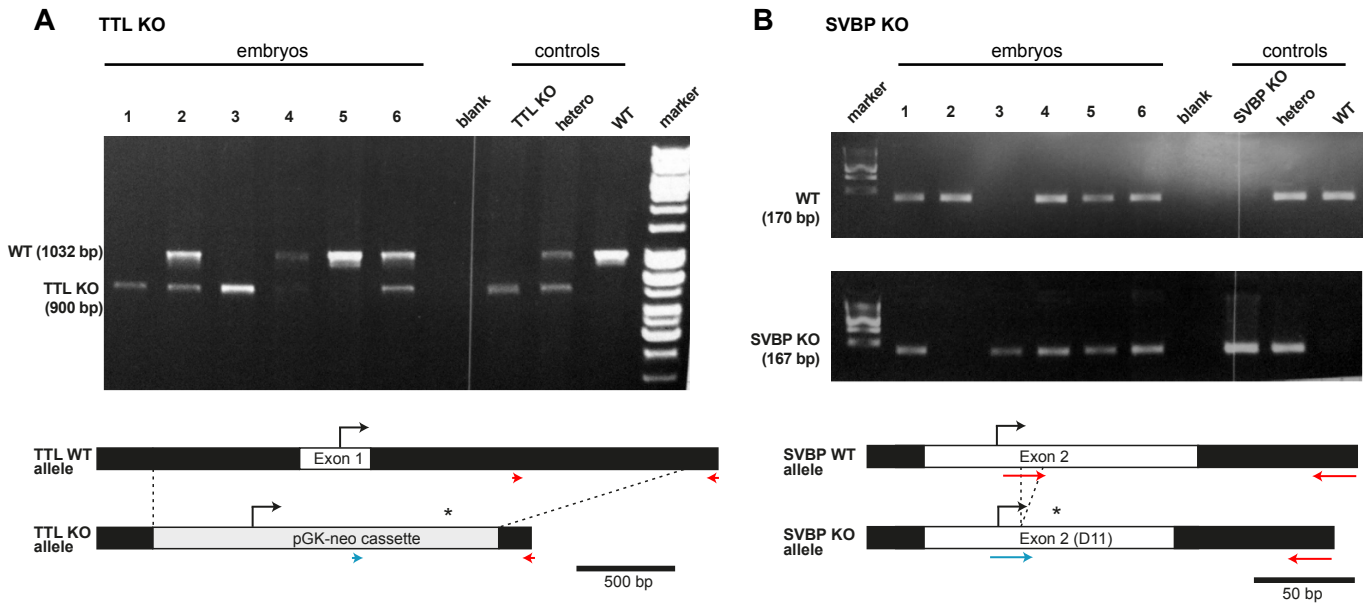

**Fig. S1. TTL-KO and SVBP-KO genotyping and protein levels of AnkG and TRIM46.** A) Exon 1 of TTL was replaced by a neomycin resistance cassette driven by phosphoglycerate kinase I promoter (pGK-neo) as described in Erck et al. (2005). B) A frameshift was introduced in exon 2 of SVBP, causing a premature stop codon (\*), as described in Pagnamenta et al. (2019). For details on genotyping primers, see Material & Methods.

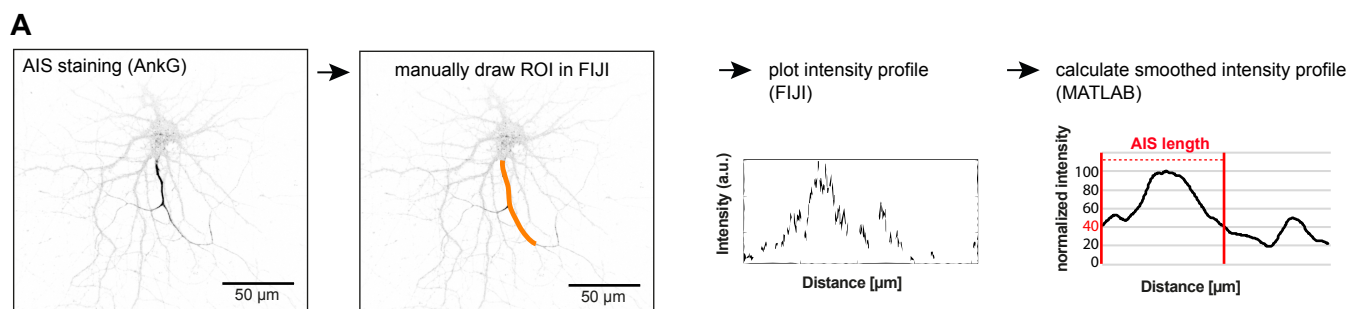

**Fig. S2. Overview of the workflow for AIS length calculation.**

A) Neurons were stained with an AIS marker (AnkG or TRIM46). A ROI was drawn manually from the cell body over the entire length of the marker region in FIJI. Raw intensity profiles from FIJI were smoothed in MATLAB using a 3-pixel sliding window and normalized to 100%. Start and end of the AIS were defined as the points where the normalized intensity crossed above or below 40% of the maximum intensity. Scale bar = 50  $\mu\text{m}$ .



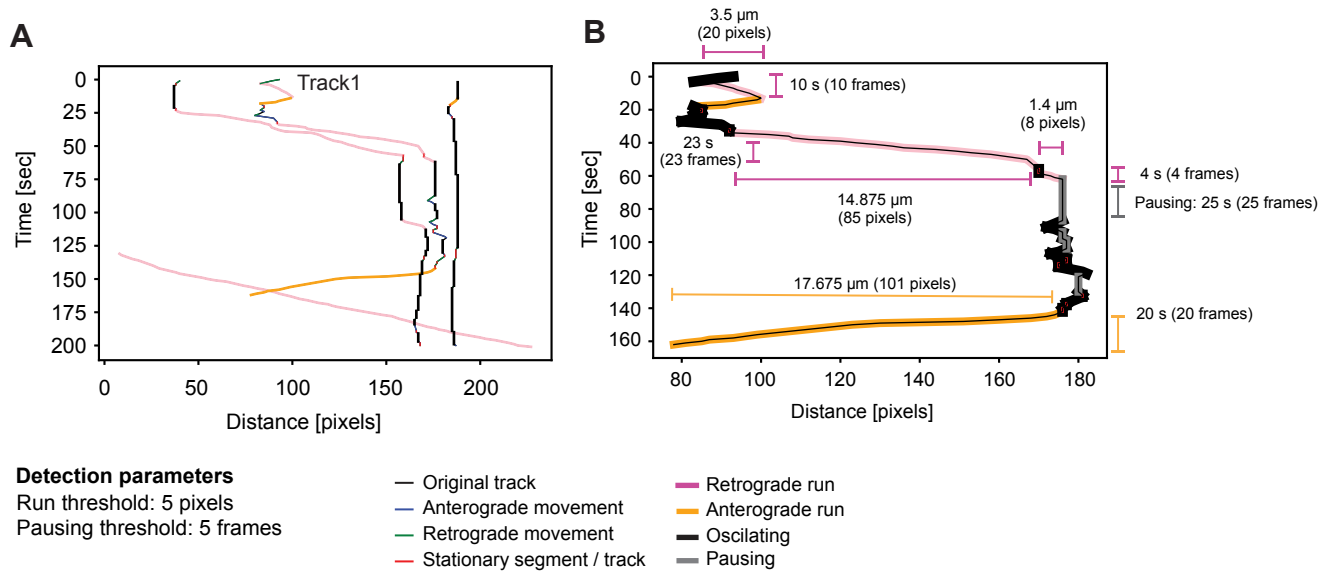

**Fig. S3. Semi-automated analysis of lysotracker-positive vesicles.** A) Example of kymograph reconstruction via the KYMOA program (<https://github.com/HU-Berlin-Optobiology/AIS-project.git>) showing Lysotracker-vesicle trajectories in the axonal compartment of a mouse hippocampal neuron. Each track represents the trajectory of one Lysotracker-positive vesicle. B) Annotation of track 1. In total, 3 processive retrograde runs, 2 processive anterograde runs, 3 pausing events and 6 oscillating movements were identified with the detection parameters indicated at the bottom of the figure.

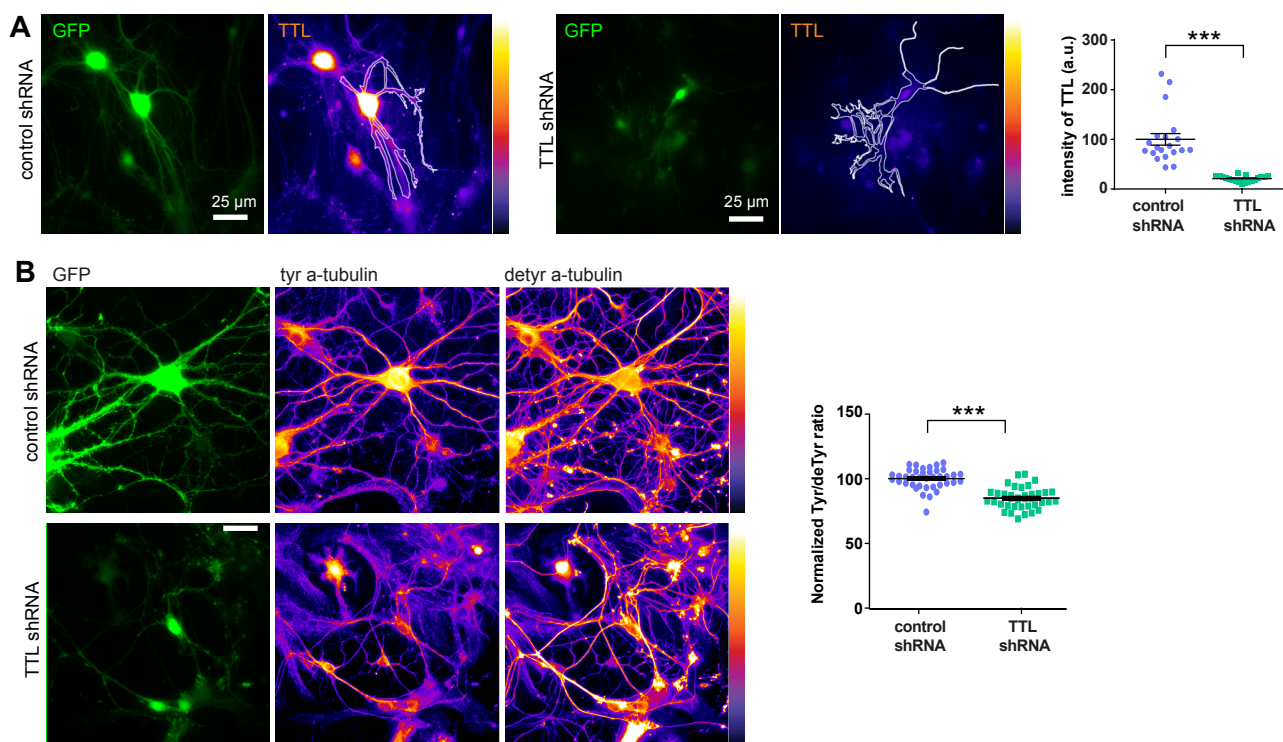

**Fig. S4. Acute shRNA knockdown of TTL in mouse hippocampal neurons. A)** Knockdown of TTL leads to reduced detected TTL levels in DIV 14 neurons. Cell outline is marked with white mask. **B)** Knockdown of TTL decreases the Tyr/deTyr ratio in DIV14 neurons. Scale bars = 25  $\mu$ m. (A)  $n = 20$ , 19 cells from control (1 independent culture) and TTL shRNA (1 independent culture). (B)  $n = 39$ , 38 cells from control (2 independent cultures) and TTL shRNA (2 independent cultures). Error bars show mean  $\pm$  SEM.

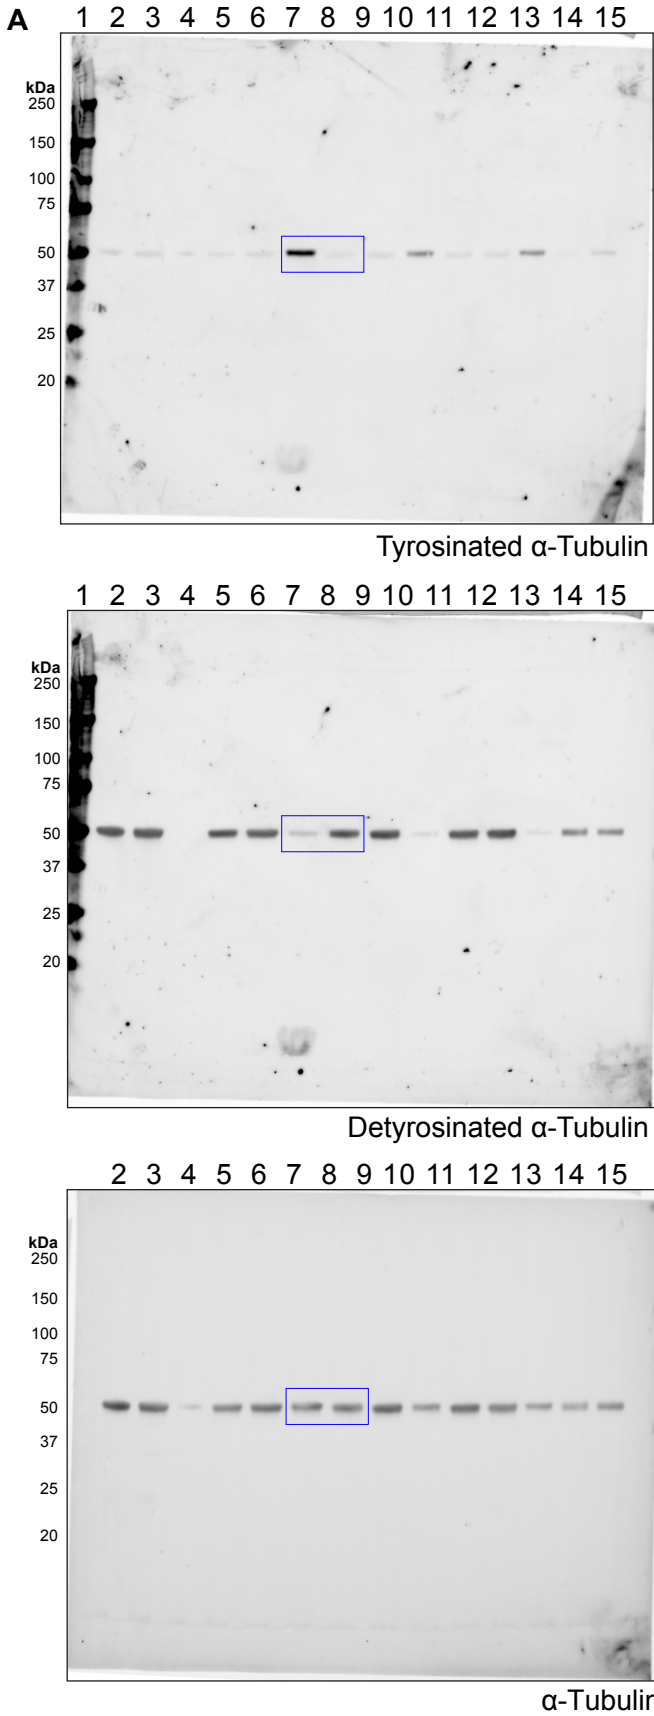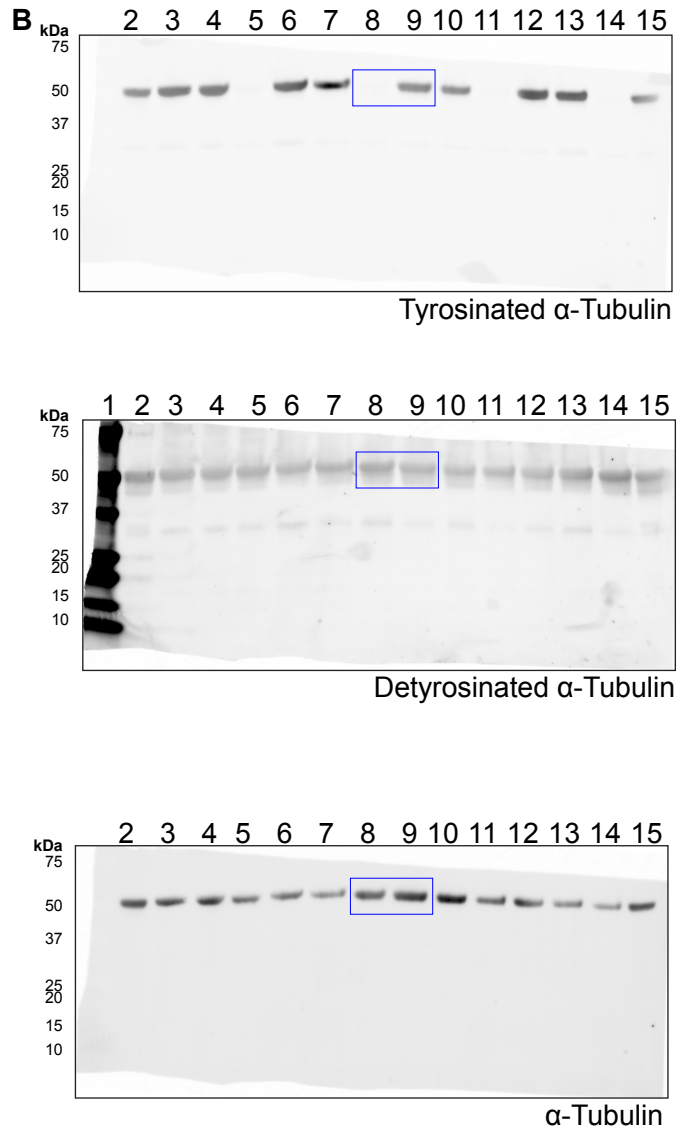

**Fig. S5. Western blot Transparency corresponding to Fig. 1.**

**A)** Whole membranes corresponding to Figure 1 B), blue boxes correspond to insets shown in Fig. S1 C), insets have been flipped horizontally and contrast was increased. 1 Protein Ladder, 2 WT, 3 SVBP het., 4 SVBP KO, 5 WT, 6 SVBP het., 7 SVBP KO, 8 WT, 9 SVBP het., 10 SVBP KO, 11 WT, 12 SVBP het., 13 SVBP KO, 14 WT, 15 WT+TTL. **B)** Whole membranes corresponding to Figure 1 C), blue boxes correspond to insets shown in supplemental Figure 1 C), insets have been flipped horizontally and contrast was increased. 1 Protein Ladder, 2 Cl, 3 WT, 4 TTL het., 5 TTL KO, 6 WT, 7 TTL het., 8 TTL KO, 9 WT, 10 TTL het., 11 TTL KO, 12 WT, 13 TTL het., 14 TTL KO, 15 Cl.

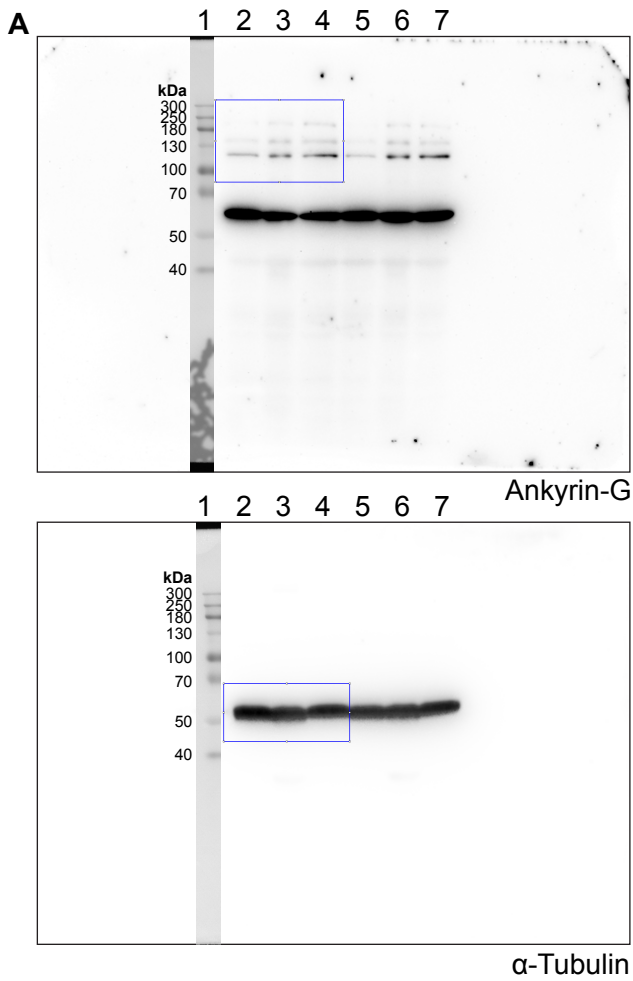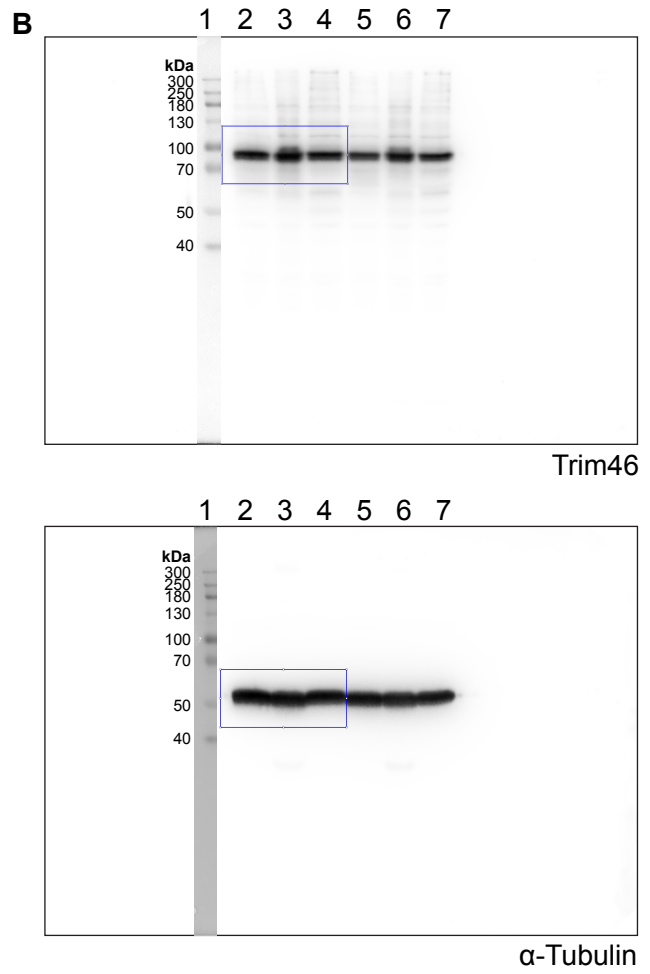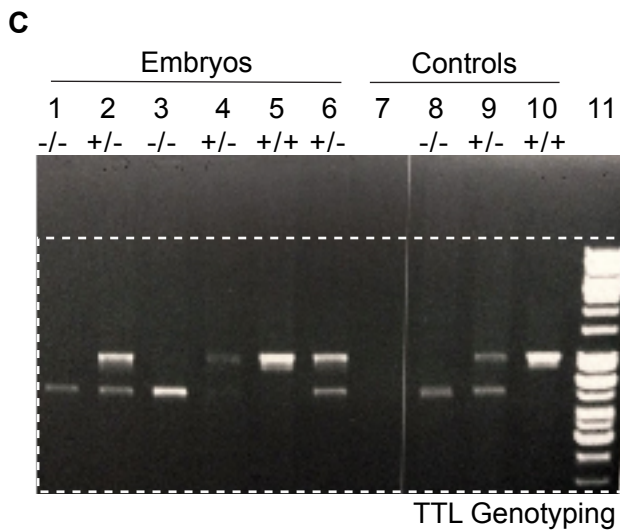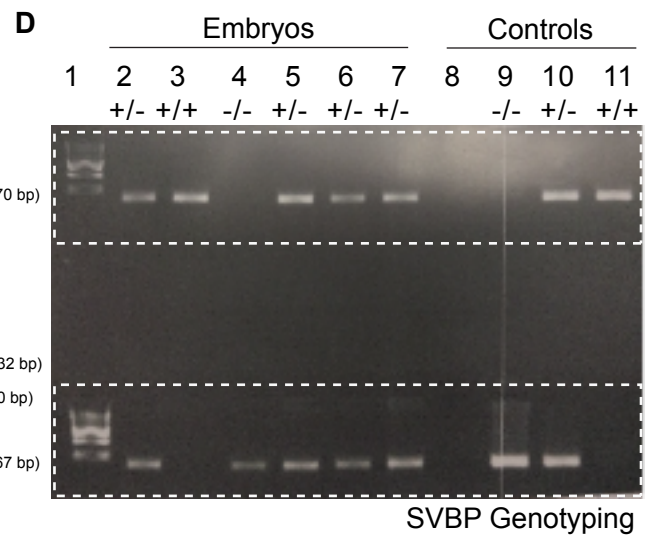

**Fig. S6. Western blot and agarose gel transparency corresponding to Fig. 2 and Fig. S1**

**A)** Whole membranes corresponding to Figure 2 A), blue boxes correspond to insets shown in Figure 2 A), insets have been flipped horizontally. 1 Spectra High-Range, 2 TTL KO, 3 WT, 4 SVBP KO, 5 TTL KO, 6 WT, 7 SVBP KO. **B)** Whole membranes corresponding to Figure 2 B), blue boxes correspond to insets shown in Figure 2 B), insets have been flipped horizontally. 1 Spectra High-Range, 2 TTL KO, 3 WT, 4 SVBP KO, 5 TTL KO, 6 WT, 7 SVBP KO. **C)** Whole agarose gel corresponding to Supplemental Figure 1 A), dashed line box corresponds to inset shown in Supplemental Figure 1 A). 1 Embryo #1: TTL KO, 2 Embryo #2: TTL het., 3 Embryo #3: TTL KO, 4 Embryo #4: TTL het., 5 Embryo #5: WT, 6 Embryo #6: TTL het., 7 blank control, 8 TTL KO control, 9 TTL het. control, 10 WT control, 11 DNA marker. **D)** Whole agarose gel corresponding to Supplemental Figure 1 B), dashed line boxes correspond to insets shown in Supplemental Figure 1 B). 1 DNA marker, 2 Embryo #1: SVBP het., 3 Embryo #2: WT, 4 Embryo #3: SVBP KO, 5 Embryo #4: SVBP het., 6 Embryo #5: SVBP het., 7 Embryo #6: SVBP het., 8 blank control, 9 SVBP KO control, 10 SVBP het. control, 11 WT control.

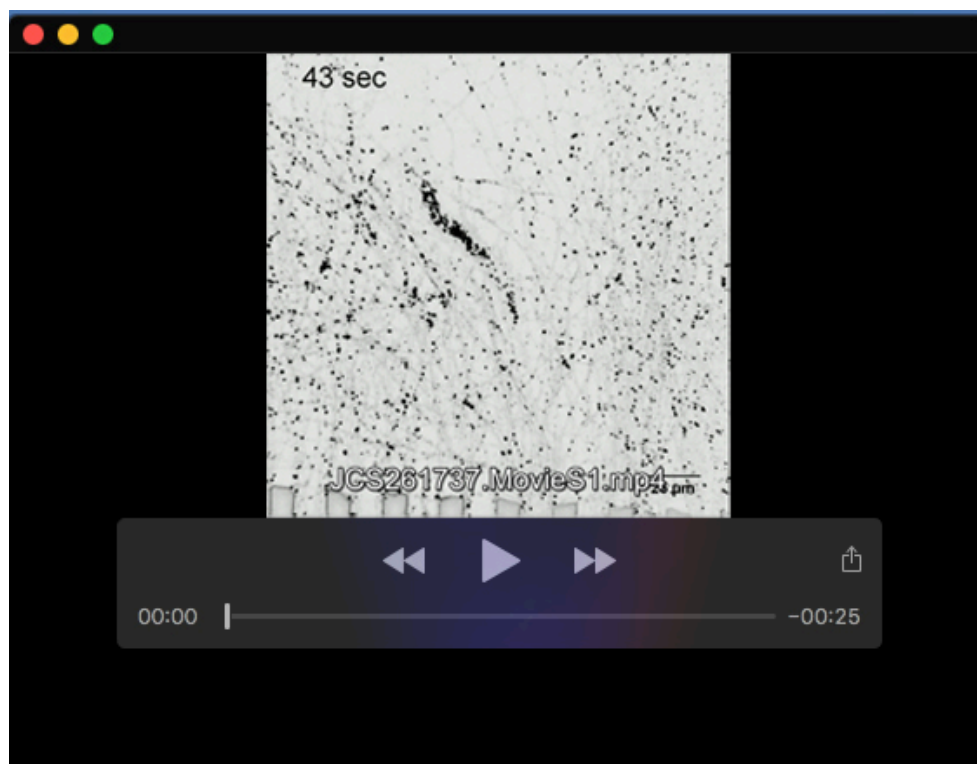

**Movie 1.** Corresponding to Fig. 4B. Movement of lysotracker-positive vesicles in the axonal compartment of SVBP KO neurons grown in 2-compartment MFCs imaged at 1 frame per second. Scale bar = 25  $\mu\text{m}$ .

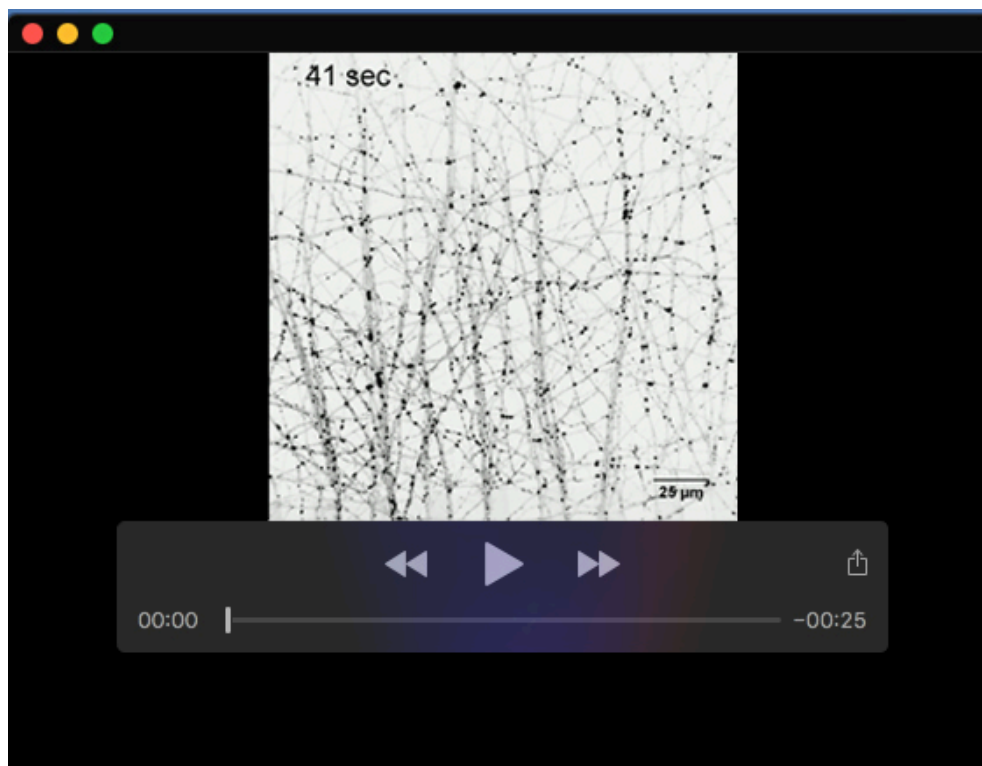

**Movie 2.** Corresponding to Fig. 4C. Movement of lysotracker-positive vesicles in the axonal compartment of WT neurons grown in 2-compartment MFCs imaged at 1 frame per second. Scale bar = 25  $\mu\text{m}$ .



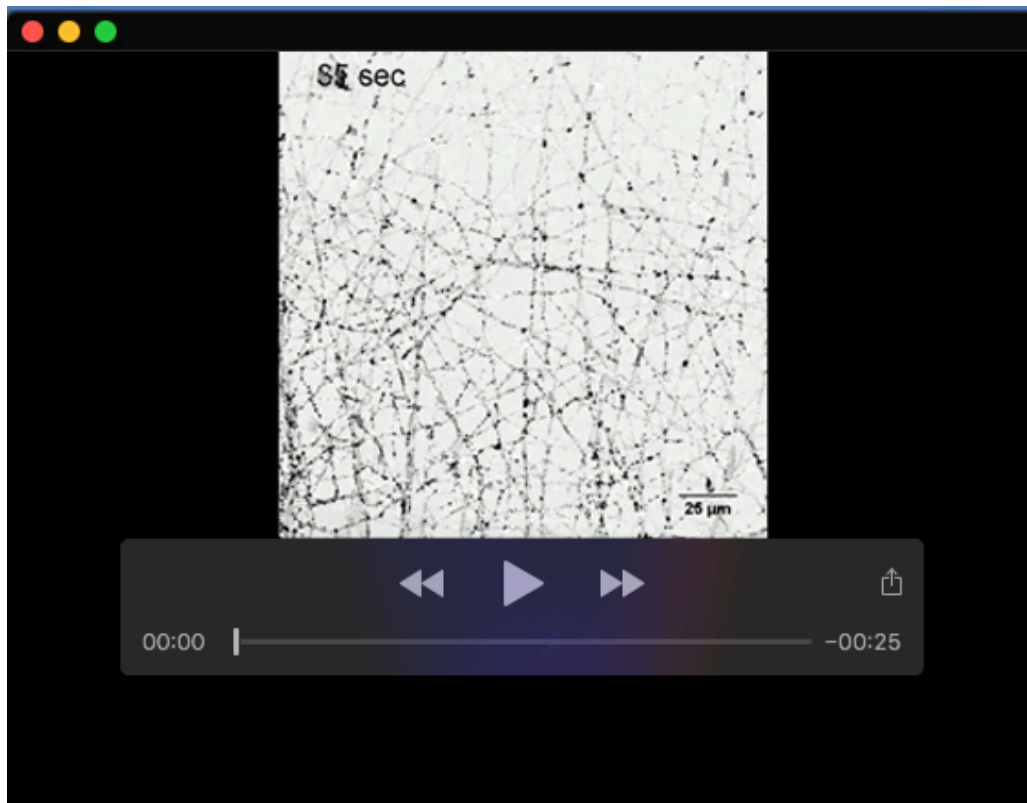

**Movie 3.** Corresponding to Fig. 4D. Movement of lysotracker-positive vesicles in the axonal compartment of TTL KO neurons grown in 2-compartment MFCs imaged at 1 frame per second. Scale bar = 25  $\mu\text{m}$ .



**Table S1. Crucial reagents and resources Primary antibodies**

*Confocal and STED imaging*

| Target                   | Host   | Supplier         | Product number | Dilution |
|--------------------------|--------|------------------|----------------|----------|
| AnkyrinG                 | Mouse  | Millipore        | MABN466        | 1:500    |
| TRIM46                   | Rabbit | Synaptic Systems | 377 003        | 1:500    |
| Beta-4-spectrin          | Mouse  | Neuromab         | 75-377         | 1:500    |
| MAP2                     | Mouse  | Sigma            | M4403          | 1:500    |
| MAP2                     | Rabbit | Abcam            | ab32454        | 1:500    |
| Detyr- $\alpha$ -tubulin | Rabbit | Abcam            | ab48389        | 1:500    |
| Tubulin Tyrosine Ligase  | Mouse  | Proteintech      | 66076-1-Ig     | 1:500    |

*Western Blot – Fig. 1*

|                                   |        |                                                              |      |         |
|-----------------------------------|--------|--------------------------------------------------------------|------|---------|
| $\alpha$ -tubulin ( $\alpha$ 3A1) | Mouse  | <i>Self-made<br/>(described in<br/>Aillaud et al., 2017)</i> | n.a. | 1:10000 |
| Tyr- $\alpha$ -tubulin (YL1/2)    | Rat    |                                                              | n.a. | 1:10000 |
| Detyr- $\alpha$ -tubulin          | Rabbit |                                                              | n.a. | 1:10000 |

*Western Blot – Fig. 2*

|                   |        |               |            |        |
|-------------------|--------|---------------|------------|--------|
| Ankyrin-G         | Mouse  | EMD Millipore | MABN466    | 1:500  |
| TRIM46            | Rabbit | Proteintech   | 30298-1-AP | 1:2000 |
| $\alpha$ -tubulin | Mouse  | Sigma         | T5168      | 1:2000 |

**Secondary antibodies**

*Confocal Imaging*

| Target | Host | Conjugation     | Supplier      | Product number | Dilution |
|--------|------|-----------------|---------------|----------------|----------|
| Mouse  | Goat | Alexa Fluor 568 | Thermo Fisher | A-11031        | 1:500    |
| Rabbit | Goat | Alexa Fluor 488 | Thermo Fisher | A-21245        | 1:500    |
| Mouse  | Goat | Alexa Fluor 594 | Thermo Fisher | A-11005        | 1:500    |

*STED Imaging*

|       |      |                      |                   |           |       |
|-------|------|----------------------|-------------------|-----------|-------|
| Mouse | Goat | Alexa Fluor 594      | Thermo Fisher     | A-11005   | 1:500 |
| Mouse | Goat | Abberior Star Orange | Fisher Scientific | NC1933863 | 1:500 |

*Western Blot*

|        |      |     |         |             |          |
|--------|------|-----|---------|-------------|----------|
| Mouse  | Goat | HRP | Dianova | 115-035-146 | 1:10 000 |
| Rabbit | Goat | HRP | Dianova | 111-035-144 | 1:10 000 |

### Other reagents

| Name                            | Supplier      | Product number | Dilution |
|---------------------------------|---------------|----------------|----------|
| DAPI                            | Sigma         | D9542          | 1:1000   |
| Lysotracker Green DND-26        | Thermo Fisher | L7526          | 1:10.000 |
| Lysotracker Red DND-99          | Thermo Fisher | L7528          | 1:20.000 |
| Magic Red Cathepsin-B Assay Kit | Biomol        | ICT937         | 1:250    |
| Phalloidin-Atto647N             | Sigma         | 65906          | 1:50     |

### AAVs

| Name                                                                                                                                                                  | Supplier | Viral titer                           | Dilution |
|-----------------------------------------------------------------------------------------------------------------------------------------------------------------------|----------|---------------------------------------|----------|
| AAV9 sh_5027 (control shRNA)<br>produced from pAAV9-U6-<br>shRNA_5027-EF1 $\alpha$ -eGFP<br>shRNA sequence:<br>GGAATCTCATTTCGATGCATACCTC<br>GAGGTATGCATCGAATGAGATTCC  | Servier  | 7.0 <sup>12</sup> viral<br>genomes/ml | 1:8000   |
| AAV9 sh_3616 (mouse TTL shRNA)<br>produced from pAAV9-U6-<br>shRNA_3616-EF1 $\alpha$ -eGFP<br>shRNA sequence:<br>AAGTGCACGTGATCCAGAAATCTC<br>GAGATTTCTGGATCACGTGCACTT | Servier  | 1.5 <sup>13</sup> viral<br>genomes/ml | 1:8000   |

### References

**Aillaud et al.** Vasohibins/SVBP are tubulin carboxypeptidases (TCPs) that regulate neuron differentiation. *Science*. 2017 Dec 15; **358** (6369):1448-1453.
